# Supplementary material for: QTL Mapping and Data Mining to Identify Genes Associated with Soybean Epicotyl Length Using Cultivated Soybean and Wild Soybean
Source: MDPI journal article supplement (doi:10.3390/ijms25063296), 2024-03-14
Supplement: s1 [file s1]

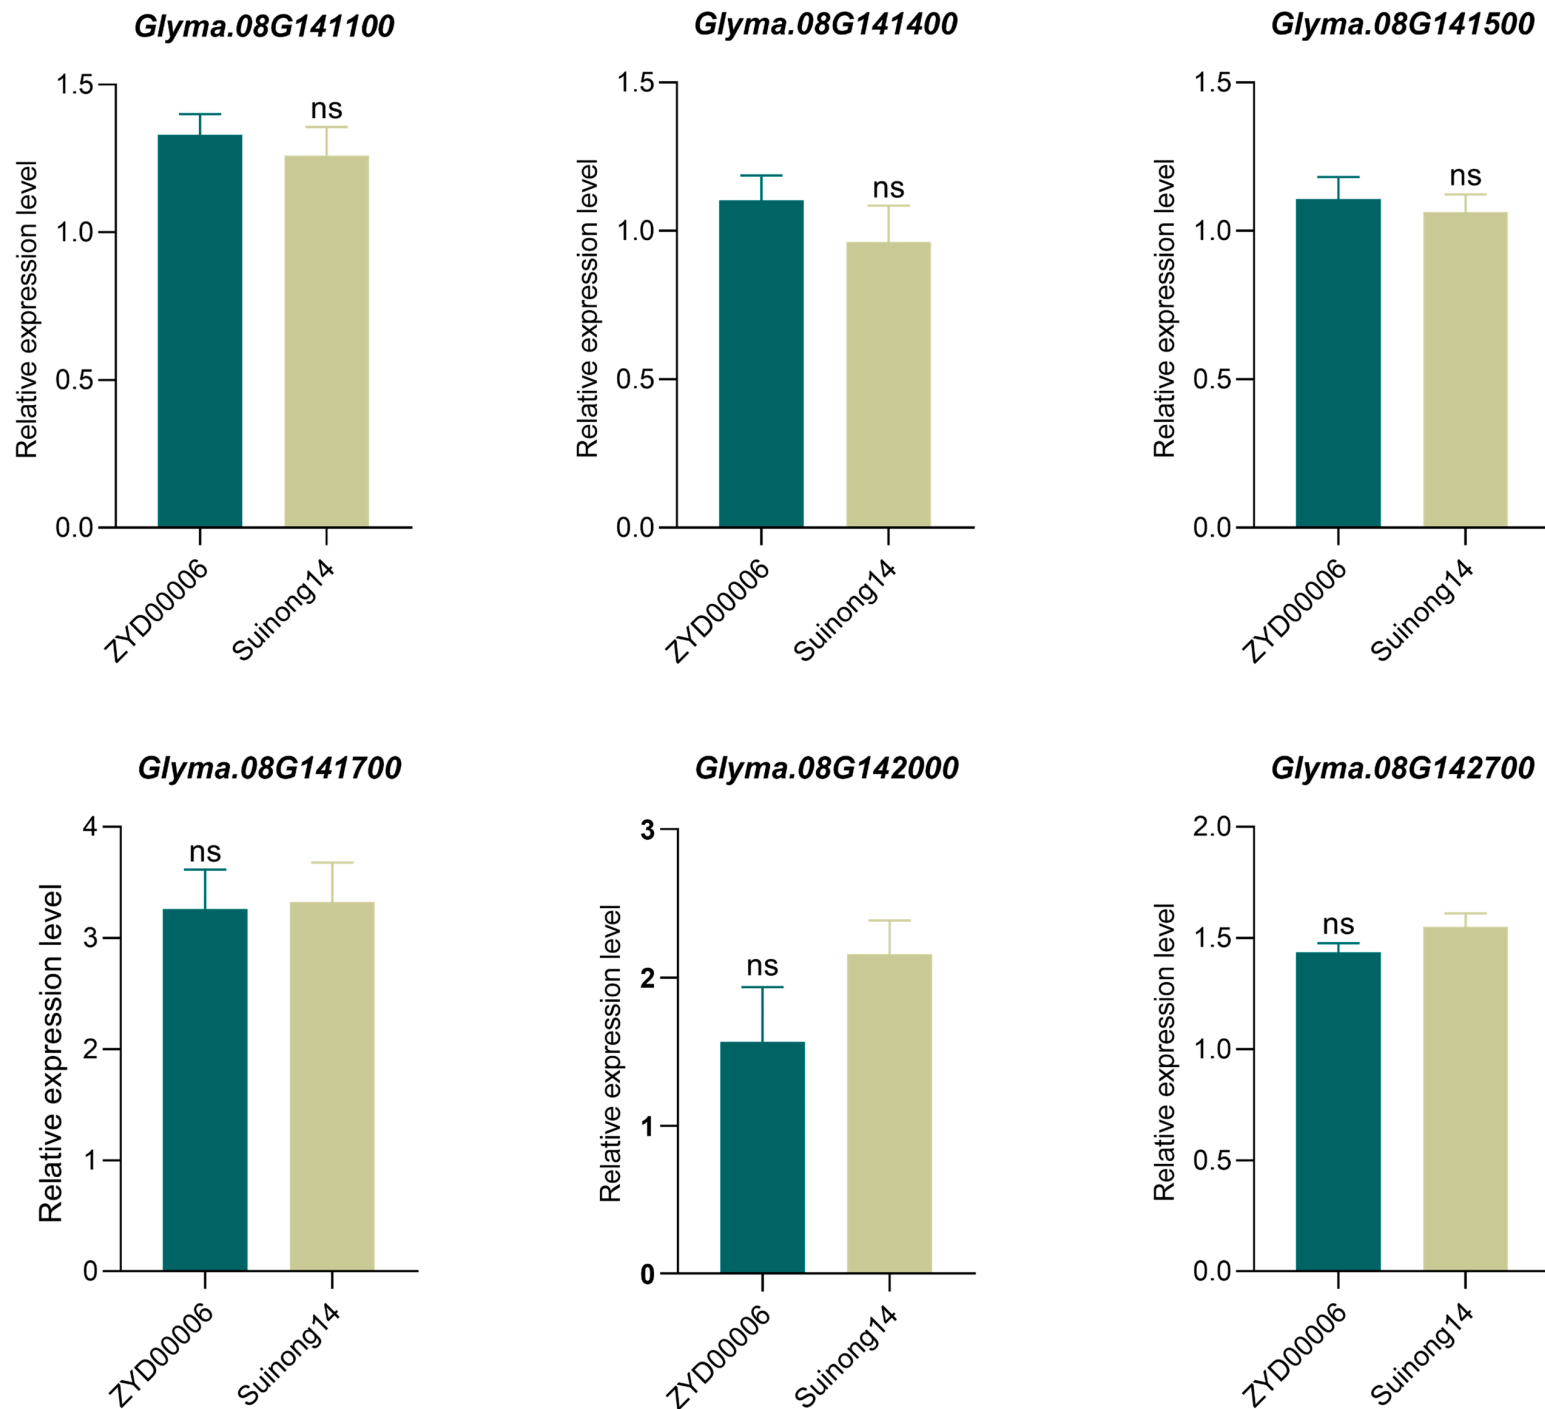

**Figure S1:** Relative gene expression in candidate was analyzed via qPCR. Data were compared via Student's *t*-tests (ns: not significant).
