# Supplementary material for: QTL Mapping and Data Mining to Identify Genes Associated with Soybean Epicotyl Length Using Cultivated Soybean and Wild Soybean
Source: Int J Mol Sci. 2024 Mar 14;25(6):3296. doi: 10.3390/ijms25063296 (PMC10970105; doi:10.3390/ijms25063296)
Supplement: Supplementary file 1 [file ijms-25-03296-s001.zip › Table S1.xlsx]

## Sheet: Sheet1
Table S1. Primers used in this study
Gene	Sequence 5’-3’	Annotation and Functions
Glyma.08G140900	Fwd-AAGTCCTTTAGCTAGCGTCTTT	qRT-PCR
	Rev-GCCTTTGCACTTTAACAACAAC
Glyma.08G141100	Fwd-AAGATAACAAGACCGAAGCTCA	qRT-PCR
	Rev-AACCTTTTTCCCATACAACACG
Glyma.08G141400	Fwd-AGATAGATTGGCTGTTGTGTCA	qRT-PCR
	Rev-CTGCATTTTCGATTACCCGAAT
Glyma.08G141500	Fwd-AATTGCGATTAAGGTCATGCTG	qRT-PCR
	Rev-ACAACACTTCGTTCTCCAGTAT
Glyma.08G141700	Fwd-GTGAAACCTCATGAGCTAGTCT	qRT-PCR
	Rev-CAACAAAATGTAAAGAGCACGC
Glyma.08G141800	Fwd-TGCGCATTAAACGAGAATTAGG	qRT-PCR
	Rev-TTTGAGACCTCGAGTACTTTCC
Glyma.08G142000	Fwd-TGATTTCTCAAAGATCCGGGAA	qRT-PCR
	Rev-AATCTTACAGTTGGAGAGTGGG
Glyma.08G142700	Fwd-ATGGATTTTGAAGACAGGGCTA	qRT-PCR
	Rev-CGCGTTAGGATTCTTGAAAGAG
Glyma.08G142800	Fwd-CAGGATGTTTTTGCACACACTA	qRT-PCR
	Rev-AAATTTGACAGCCTCAACTTCC
Glyma.08G142400	Fwd-GACACCAACTTCAAACCCTTTT	qRT-PCR
	Rev-CGATCGAATCTTCCAAGCTTTT
	Fwd-ATGGACTTCTACTTTGGAA	Gene cloning
	Rev-TCATTTGAAAGTAGTATCAG
GmUNK1	Fwd-TGGTGCTGCCGCTATTTACTG	Reference gene for qRT-PCR
	Rev-GGTGGAAGGAACTGCTAACAATC
