# Supplementary material for: QTL Mapping and Data Mining to Identify Genes Associated with Soybean Epicotyl Length Using Cultivated Soybean and Wild Soybean
Source: Int J Mol Sci. 2024 Mar 14;25(6):3296. doi: 10.3390/ijms25063296 (PMC10970105; doi:10.3390/ijms25063296)
Supplement: Supplementary file 1 [file ijms-25-03296-s001.zip › Table S2.xlsx]

## Sheet: sheet1
Table S2. Epicotyl length of CSSLs
Name	EL (2021)	EL (2022)
CSSL-R1	4.26	4.42
CSSL-R2	4.32	4.46
CSSL-R3	4.28	4.51
CSSL-R4	5.02	4.77
CSSL-R5	5.21	4.75
CSSL-R6	4.65	4.31
CSSL-R7	1.78	1.13
CSSL-R8	4.75	4.51
CSSL-R9	1.23	1.21
CSSL-R10	3	3.23
CSSL-R11	4.24	4.12
CSSL-R12	2.48	1.08
CSSL-R13	4.72	4.67
CSSL-R14	5	4.68
CSSL-R15	4.95	5.14
CSSL-R16	5.22	5
CSSL-R17	4.8	4.77
CSSL-R18	3.98	3.67
CSSL-R19	4.6	4.3
CSSL-R20	4.21	4.17
CSSL-R21	5.36	5.58
CSSL-R22	4.12	4.38
CSSL-R23	4.7	4.92
CSSL-R24	3.95	4
CSSL-R25	3.99	4.06
CSSL-R26	4.17	4.23
CSSL-R27	3.62	3.83
CSSL-R28	4.62	4.84
CSSL-R29	3.85	3.88
CSSL-R30	3.45	3.76
CSSL-R31	2.84	3
CSSL-R32	3.3	3.46
CSSL-R33	2.43	1.49
CSSL-R34	2.84	2.92
CSSL-R35	3.37	3.5
CSSL-R36	3.64	3.91
CSSL-R37	1.97	1.97
CSSL-R38	4.2	4
CSSL-R39	1.16	1.2
CSSL-R40	3.9	4.16
CSSL-R41	2.47	2.56
CSSL-R42	2.57	2.7
CSSL-R43	3	3
CSSL-R44	2.84	2.66
CSSL-R45	4.12	4.17
CSSL-R46	3.94	4
CSSL-R47	4.42	4.28
CSSL-R48	3.98	4.1
CSSL-R49	3.97	3.8
CSSL-R50	3.77	3.65
CSSL-R51	4.46	4.77
CSSL-R52	3.18	3
CSSL-R53	5.28	5.42
CSSL-R54	1.49	2.03
CSSL-R55	4.6	4.71
CSSL-R56	5.07	4.76
CSSL-R57	4.67	4.41
CSSL-R58	3.82	3.79
CSSL-R59	4.28	4
CSSL-R60	4.63	4.66
CSSL-R61	4.48	4.65
CSSL-R62	4.3	4.08
CSSL-R63	2.34	2.44
CSSL-R64	3.85	3.87
CSSL-R65	3.84	3.9
CSSL-R66	4.51	4.72
CSSL-R67	4.32	4.3
CSSL-R68	4.02	4.16
CSSL-R69	4.12	3.9
CSSL-R70	3.38	3.38
CSSL-R71	3.82	3.9
CSSL-R72	2.96	2.85
CSSL-R73	3.54	3.4
CSSL-R74	5	5
CSSL-R75	1.69	1.39
CSSL-R76	4.22	4
CSSL-R77	4.65	4.7
CSSL-R78	4.31	4.28
CSSL-R79	4.35	4.3
CSSL-R80	4.17	3.96
CSSL-R81	4.72	4.74
CSSL-R82	4.56	4.5
CSSL-R83	5.01	4.87
CSSL-R84	5.36	5.5
CSSL-R85	4.89	4.8
CSSL-R86	6.1	6.17
CSSL-R87	5.74	5.66
CSSL-R88	3.78	3.92
CSSL-R89	4.63	4.7
CSSL-R90	5.13	5.25
CSSL-R91	1.88	1.7
CSSL-R92	4.12	4.28
CSSL-R93	3.68	3.64
CSSL-R94	4.12	4.23
CSSL-R95	4.19	4.36
CSSL-R96	3.97	3.91
CSSL-R97	3.76	3.68
CSSL-R98	4.48	4.59
CSSL-R99	5.16	5.24
CSSL-R100	4.13	4.33
CSSL-R101	3.64	3.9
CSSL-R102	3.27	3.34
CSSL-R103	2.63	2.47
CSSL-R104	3.96	3.74
CSSL-R105	3.28	3.28
CSSL-R106	3	3.12
CSSL-R107	2.74	2.91
CSSL-R108	1.23	1.87
CSSL-R109	5.13	5.23
CSSL-R110	5.09	5.13
CSSL-R111	5.32	5.17
CSSL-R112	2.01	1.9
CSSL-R113	2.3	2.58
CSSL-R114	2.51	2.44
CSSL-R115	4.37	4.33
CSSL-R116	1.74	1.76
CSSL-R117	5.71	5.93
CSSL-R118	2.39	2.28
CSSL-R119	4.2	4.27
CSSL-R120	4.31	4.34
CSSL-R121	4.4	4.67
CSSL-R122	1.32	1.72
CSSL-R123	4.99	5
CSSL-R124	5.06	5.18
CSSL-R125	4.12	4.24
CSSL-R126	4.23	4.45
CSSL-R127	2.79	2.81
CSSL-R128	4.9	4.67
CSSL-R129	5.03	5
CSSL-R130	1.44	1.45
CSSL-R131	5.32	5.18
CSSL-R132	5.39	5.54
CSSL-R133	5.28	5.28
CSSL-R134	3.96	3.9
CSSL-R135	3.84	3.73
CSSL-R136	3.69	3.8
CSSL-R137	3.66	3.62
CSSL-R138	5.46	5.32
CSSL-R139	5.27	5.23
CSSL-R140	3.48	3.44
CSSL-R141	5.42	5.38
CSSL-R142	4.32	4.37
CSSL-R143	4.42	4.46
CSSL-R144	5.06	5.12
CSSL-R145	5.06	5.1
CSSL-R146	5.48	5.5
CSSL-R147	3.98	4
CSSL-R148	5.04	4.98
CSSL-R149	4.05	4.1
CSSL-R150	4.13	4.14
CSSL-R151	5.06	5.1
CSSL-R152	5.16	5.16
CSSL-R153	1.81	1.93
CSSL-R154	4.97	4.9
CSSL-R155	5.13	5.11
CSSL-R156	6.01	6
CSSL-R157	5.21	5.17
CSSL-R158	5.21	5.22
CSSL-R159	4.63	4.6
CSSL-R160	4.25	4.3
CSSL-R161	4.22	4.28
CSSL-R162	5.06	5.1
CSSL-R163	4.32	4.41
CSSL-R164	3.73	3.77
CSSL-R165	3.96	4
CSSL-R166	4.01	4.08
CSSL-R167	3.21	3.17
CSSL-R168	4.96	5
CSSL-R169	3.97	4.02
CSSL-R170	4.13	4.1
CSSL-R171	4.81	4.76
CSSL-R172	2.96	3
CSSL-R173	4.63	4.7
CSSL-R174	3.97	3.94
CSSL-R175	3.97	3.9
CSSL-R176	5.02	5.07
CSSL-R177	3.82	3.88
CSSL-R178	4.68	4.72
CSSL-R179	4.66	4.7
CSSL-R180	5.17	5.22
CSSL-R181	4.76	4.77
CSSL-R182	4.65	4.68
CSSL-R183	4.66	4.68
CSSL-R184	5.07	5.12
CSSL-R185	2.33	1.91
CSSL-R186	3.96	3.99
CSSL-R187	4.31	4.3
CSSL-R188	5.02	4.98
CSSL-R189	4.72	4.81
CSSL-R190	5.06	5.13
CSSL-R191	3.77	3.81
CSSL-R192	3.62	3.6
CSSL-R193	5.84	5.82
CSSL-R194	3.42	3.5
CSSL-R195	4.02	4
CSSL-R196	4.97	4.98
CSSL-R197	5.14	5.1
CSSL-R198	2.77	1.13
CSSL-R199	5.13	5.14
CSSL-R200	5.34	5.34
CSSL-R201	4.99	5.14
CSSL-R202	1.268	1.25
CSSL-R203	4.62	4.5
CSSL-R204	3.97	4
CSSL-R205	2.94	2.98
CSSL-R206	2.51	2
CSSL-R207	2.13	2.16
