# Supplementary material for: QTL Mapping and Data Mining to Identify Genes Associated with Soybean Epicotyl Length Using Cultivated Soybean and Wild Soybean
Source: Int J Mol Sci. 2024 Mar 14;25(6):3296. doi: 10.3390/ijms25063296 (PMC10970105; doi:10.3390/ijms25063296)
Supplement: Supplementary file 1 [file ijms-25-03296-s001.zip › Table S3.xlsx]

## Sheet: Sheet1
Table S3. Quality evaluation of RNA-Seq samples
Sample	Clean data(Reads)	Q30%
SN14_1	42097378	97.61
SN14_2	40258066	97.57
SN14_3	40828670	97.52
ZYD06_1	40925580	97.64
ZYD06_2	41638296	97.43
ZYD06_3	41950472	97.8
