# Supplementary material for: QTL Mapping and Data Mining to Identify Genes Associated with Soybean Epicotyl Length Using Cultivated Soybean and Wild Soybean
Source: Int J Mol Sci. 2024 Mar 14;25(6):3296. doi: 10.3390/ijms25063296 (PMC10970105; doi:10.3390/ijms25063296)
Supplement: Supplementary file 1 [file ijms-25-03296-s001.zip › Table S4.xlsx]

## Sheet: Sheet1
Table S4. SNP and Indel of QTL region candidate gene between Suinong 14 and ZYD00006
No.	Gene ID	SNPs in Extron	SNPs in Promoter region	InDels in Extron	InDels in Promoter region	Annotation
1	Glyma.08G140900	2	10		6	ABC2 homolog 13
2	Glyma.08G141100	1	23		6	UNCHARACTERIZED
3	Glyma.08G141200	3	14		3	UNCHARACTERIZED
4	Glyma.08G141300		9		3	stress enhanced protein 2
5	Glyma.08G141400	1	21		4	UNCHARACTERIZED
6	Glyma.08G141500	4	17	2	5	shikimate kinase 1
7	Glyma.08G141600	4	7		5	Tetratricopeptide repeat (TPR)-like superfamily protein
8	Glyma.08G141700	2	3		2	Ribosomal protein L6 family protein
9	Glyma.08G141800	4	3			Ribosomal protein L6 family protein
10	Glyma.08G141900	3	5			UNCHARACTERIZED
11	Glyma.08G142000	1				UNCHARACTERIZED
12	Glyma.08G142100	1	14		11	UNCHARACTERIZED
13	Glyma.08G142300	1	2		2	Ras-related small GTP-binding family protein
14	Glyma.08G142400	2	6		1	WRKY transcription factor 6
15	Glyma.08G142500	4	8		2	GATA type zinc finger transcription factor family protein
16	Glyma.08G142600	1	12		5	RAB GTPase homolog G3A
17	Glyma.08G142700		1		1	chloroplast-localized ISCA-like protein
18	Glyma.08G142800		7		1	copper ion binding;cobalt ion binding;zinc ion binding
19	Glyma.08G142900		6		3	violaxanthin de-epoxidase-related
20	Glyma.08G143200	1	1			UNCHARACTERIZED
21	Glyma.08G143300	1	3		4	UNCHARACTERIZED
22	Glyma.08G143400	1	12		7	WRKY DNA-binding protein 13
23	Glyma.08G143500	1	13		5	alkaline/neutral invertase
24	Glyma.08G143600			1		UNCHARACTERIZED
25	Glyma.08G143700	4	2	1	1	UNCHARACTERIZED
26	Glyma.08G143800	3	17		6	nucleotide sugar transporter-KT 1
27	Glyma.08G143900		2			Small nuclear ribonucleoprotein family protein
