# Supplementary material for: QTL Mapping and Data Mining to Identify Genes Associated with Soybean Epicotyl Length Using Cultivated Soybean and Wild Soybean
Source: Int J Mol Sci. 2024 Mar 14;25(6):3296. doi: 10.3390/ijms25063296 (PMC10970105; doi:10.3390/ijms25063296)
Supplement: Supplementary file 1 [file ijms-25-03296-s001.zip › Table S5.xlsx]

## Sheet: Sheet1
Table S5. Epicotyl length measurements of 310 germplasm resources
Name	Type	EL	Haplotype
1020-Ke Jiao 07	Improved cultivar	4.43	Hap1
1037-He Nong 75	Improved cultivar	4.14	Hap1
Bei 25031	Improved cultivar	4.49	Hap1
Bei An 1	Improved cultivar	4.47	Hap1
Bei Feng 10	Improved cultivar	4.66	Hap1
Bei Feng 11	Improved cultivar	4.69	Hap1
Bei Feng 9	Improved cultivar	4.62	Hap1
Bei Feng 9-2	Improved cultivar	4.64	Hap1
Bei Jiang 1	Improved cultivar	4.71	Hap1
Bei Jiang 91	Improved cultivar	4.68	Hap1
Bei Jiao 05-8021	Improved cultivar	4.5	Hap1
Bei Xing 1	Improved cultivar	4.61	Hap1
BlackJack 21	Improved cultivar	5.24	Hap1
Chang Nong 17	Improved cultivar	4.91	Hap1
Chang Nong 20	Improved cultivar	5.16	Hap1
Chang Nong 29	Improved cultivar	5.38	Hap1
Chi Dou 1	Improved cultivar	4.67	Hap1
Dong Da 2	Improved cultivar	4.77	Hap1
Dong Nong 50	Improved cultivar	4.04	Hap1
Dong Nong 88	Improved cultivar	4.69	Hap1
Dong Nong L202	Improved cultivar	4.32	Hap1
Dong Sheng 3	Improved cultivar	4.48	Hap1
Dong Sheng 7	Improved cultivar	4.32	Hap1
Dong Sheng 92	Improved cultivar	4.4	Hap1
Feng Dou 1	Improved cultivar	4.79	Hap1
Feng Shou 24	Improved cultivar	5.22	Hap1
Feng Shou 25	Improved cultivar	5.17	Hap1
Feng Shou 26	Improved cultivar	5.31	Hap1
Feng Shou 26	Improved cultivar	5.38	Hap1
Feng Shou 5	Improved cultivar	5.11	Hap1
H09-95	Improved cultivar	4.32	Hap1
H10-1518	Improved cultivar	4.22	Hap1
H10-2430	Improved cultivar	4.45	Hap1
H16	Improved cultivar	5.17	Hap1
H37	Improved cultivar	5.18	Hap1
H38-2	Improved cultivar	5.21	Hap1
H39	Improved cultivar	5.32	Hap1
Ha 05-7778	Improved cultivar	5.07	Hap1
Ha 06-3869	Improved cultivar	4.91	Hap1
Ha 11-3646	Improved cultivar	5.08	Hap1
Ha 12-3510	Improved cultivar	5.54	Hap1
Ha 12-4547	Improved cultivar	5.53	Hap1
Ha 12-4891	Improved cultivar	5.19	Hap1
Ha 13-2413	Improved cultivar	5.44	Hap1
Ha 13-2958	Improved cultivar	5.39	Hap1
Ha 14-2028	Improved cultivar	5.67	Hap1
Ha 14-2146	Improved cultivar	5.51	Hap1
H-Bei Dou 40	Improved cultivar	6	Hap1
He 00-23	Improved cultivar	5.17	Hap1
He Dou 6	Improved cultivar	5.68	Hap1
He Feng 29	Improved cultivar	5.46	Hap1
He Feng 40	Improved cultivar	6.03	Hap1
He Feng 47	Improved cultivar	6.21	Hap1
He Feng 51	Improved cultivar	6.17	Hap1
He Feng 55	Improved cultivar	5.9	Hap1
He Fu 05	Improved cultivar	5.34	Hap1
He Nong 62	Improved cultivar	5.41	Hap1
He Nong 73	Improved cultivar	5.08	Hap1
He Nong 73-2	Improved cultivar	5.17	Hap1
He Nong 85	Improved cultivar	5.16	Hap1
He Nong 95	Improved cultivar	5	Hap1
HE14	Improved cultivar	4.94	Hap1
Hei He 13	Improved cultivar	4.99	Hap1
Hei He 18	Improved cultivar	4.87	Hap1
Hei He 21	Improved cultivar	4.96	Hap1
Hei He 23	Improved cultivar	4.99	Hap1
Hei HE 38	Improved cultivar	4.67	Hap1
Hei He 39	Improved cultivar	4.68	Hap1
Hei He 42	Improved cultivar	4.66	Hap1
Hei He 45	Improved cultivar	4.43	Hap1
Hei He 51	Improved cultivar	4.52	Hap1
Hei He 52	Improved cultivar	4.4	Hap1
Hei He 53	Improved cultivar	5	Hap1
Hei He 6	Improved cultivar	4.98	Hap1
Hei Kang 06-7	Improved cultivar	5.19	Hap1
Hei Nong 35	Improved cultivar	5.19	Hap1
Hei Nong 75	Improved cultivar	5.16	Hap1
Hei Sha 45	Improved cultivar	5.27	Hap1
Heng Dou 15	Improved cultivar	4.97	Hap1
Hu Lin 1	Improved cultivar	4.49	Hap1
Hua Jiang 12	Improved cultivar	4.87	Hap1
Hua Jiang 2	Improved cultivar	5.12	Hap1
Hua Jiang 4	Improved cultivar	5.16	Hap1
Japan 1	Improved cultivar	5	Hap1
Ji 94	Improved cultivar	5.26	Hap1
Ji Hei 6	Improved cultivar	4.22	Hap1
Ji Ke 1	Improved cultivar	4.24	Hap1
Ji Lin Xiao Li Dou 7	Improved cultivar	3.96	Hap1
Ji Nong 18	Improved cultivar	3.98	Hap1
Ji Yu 108	Improved cultivar	4.05	Hap1
Ji Yu 67	Improved cultivar	4.55	Hap1
Ji Yu 72	Improved cultivar	4.49	Hap1
Jia Nong 1	Improved cultivar	4.71	Hap1
Jia Nong 2	Improved cultivar	4.88	Hap1
Jiang Nong 417	Improved cultivar	4.83	Hap1
Jim	Improved cultivar	5	Hap1
Jin Feng 55-2	Improved cultivar	5.08	Hap1
Jin Lin 30	Improved cultivar	4.64	Hap1
Jin Pin 42	Improved cultivar	5.17	Hap1
Jin Yuan 55	Improved cultivar	5.36	Hap1
Jin Yuan 73	Improved cultivar	5.56	Hap1
Jin Yuan 95	Improved cultivar	5.47	Hap1
Jiu Feng 10	Improved cultivar	4.98	Hap1
Jiu San Hei 05-59	Improved cultivar	3.98	Hap1
Ke 11-1669	Improved cultivar	4	Hap1
Ken 09-1723	Improved cultivar	4.45	Hap1
Ken Feng 28	Improved cultivar	4.78	Hap1
Ken Feng 7	Improved cultivar	5	Hap1
Ken Jian 28	Improved cultivar	5.08	Hap1
Ken K11-7456	Improved cultivar	4.96	Hap1
Ken Nong18	Improved cultivar	4.49	Hap1
L65-1274	Improved cultivar	5.08	Hap1
L65-540	Improved cultivar	4.68	Hap1
L67-971	Improved cultivar	4.58	Hap1
L72D-4045	Improved cultivar	4.24	Hap1
L83-4387	Improved cultivar	4.33	Hap1
Liao 08Q104	Improved cultivar	4.97	Hap1
Liao Dou 37	Improved cultivar	5.18	Hap1
Long Pin 12-328	Improved cultivar	4..58	Hap1
Long Qing Dou 2	Improved cultivar	4.4	Hap1
Meng Dou 9	Improved cultivar	4.73	Hap1
Nong 75	Improved cultivar	4.94	Hap1
Sheng dou 42	Improved cultivar	5.11	Hap1
Sheng Dou 43	Improved cultivar	5.17	Hap1
Sheng Dou 48	Improved cultivar	4.82	Hap1
Shu Jin 05-9238	Improved cultivar	4.67	Hap1
Sui Nong 13	Improved cultivar	4.52	Hap1
Sui Nong 14	Improved cultivar	4.94	Hap1
Sui Nong 17	Improved cultivar	4.49	Hap1
Sui Nong 18	Improved cultivar	4.66	Hap1
Sui Nong 19	Improved cultivar	4.58	Hap1
Sui Nong 22	Improved cultivar	5.09	Hap1
Sui Nong 26	Improved cultivar	5.12	Hap1
Sui Nong 27	Improved cultivar	4.71	Hap1
Sui Nong 4	Improved cultivar	4.77	Hap1
Sui Nong 40	Improved cultivar	5.16	Hap1
Sui Nong 49	Improved cultivar	5.32	Hap1
Sui Nong 50	Improved cultivar	5.56	Hap1
Sui Nong 52	Improved cultivar	5.74	Hap1
Sui Nong 67	Improved cultivar	5.49	Hap1
Sui Nong 68	Improved cultivar	5.36	Hap1
Sui Nong 75	Improved cultivar	4.9	Hap1
Sui Nong 76	Improved cultivar	4.6	Hap1
Sui Nong 9	Improved cultivar	5.18	Hap1
Xing Nong 12	Improved cultivar	4.68	Hap1
Zhong Huang 10	Improved cultivar	4.87	Hap1
Zhong Huang 35	Improved cultivar	4.49	Hap1
Zi Hua 2	Improved cultivar	4.42	Hap1
Bei Jiao 9206	Improved cultivar	4.69	Hap1
Bin Dou 10	Improved cultivar	4.59	Hap1
Dong Nong Dou 253	Improved cultivar	4.64	Hap1
Dong Nong 57	Improved cultivar	4.44	Hap1
Dong Sheng 1	Improved cultivar	4.58	Hap1
He Feng 25	Improved cultivar	4.71	Hap1
He Feng 30	Improved cultivar	4.39	Hap1
He Feng 50	Improved cultivar	4.52	Hap1
He Fu 03-775	Improved cultivar	5.08	Hap1
He Nan 39	Improved cultivar	5.02	Hap1
He Nong 75	Improved cultivar	4.85	Hap1
Hei He 17	Improved cultivar	4.67	Hap1
Hei He 33	Improved cultivar	4.77	Hap1
Hei He 50	Improved cultivar	4.76	Hap1
Hei Nong 50	Improved cultivar	4.66	Hap1
Jiang Mo Dou 1	Improved cultivar	4.46	Hap1
Jiang Nong 416	Improved cultivar	4.64	Hap1
Ke Jiao 07	Improved cultivar	4.54	Hap1
Ken Feng 22	Improved cultivar	4.48	Hap1
Long Pin 13-369	Improved cultivar	4.52	Hap1
M39	Improved cultivar	4.76	Hap1
Sui Nong 10	Improved cultivar	4.42	Hap1
Sui Nong 69	Improved cultivar	4.61	Hap1
Zhong Huang 688	Improved cultivar	4.48	Hap1
Hei Nong 56	Improved cultivar	4.58	Hap1
75-Ke 732	Improved cultivar	4.96	Hap1
Ha 13-2187	Improved cultivar	5.02	Hap1
Ji Yu 105	Improved cultivar	4.75	Hap1
Nen Feng 20	Improved cultivar	5.13	Hap1
Long Ken 332	Improved cultivar	4.47	Hap1
Sui 07-1077	Improved cultivar	5.19	Hap1
Ken 05-3762	Improved cultivar	4.98	Hap1
Holt	Improved cultivar	2.66	Hap2
Kovean	Improved cultivar	1.89	Hap2
L67-166	Improved cultivar	3.49	Hap2
L72-1241	Improved cultivar	2.84	Hap2
LG296-7	Improved cultivar	2.88	Hap2
Mu 05-026	Improved cultivar	2.51	Hap2
NO.10	Improved cultivar	1.68	Hap2
No.16	Improved cultivar	2.24	Hap2
POLUKULTURNAYA	Improved cultivar	3.08	Hap2
Liao Xiao Li Dou 2	Improved cultivar	2.67	Hap2
Bei Dou 36	Improved cultivar	1.49	Hap2
Bei Dou 43	Improved cultivar	1.52	Hap2
Dong Nong 76	Improved cultivar	2.24	Hap2
Dong Nong 44	Improved cultivar	2.74	Hap2
H38	Improved cultivar	1.98	Hap2
Hai 6055	Improved cultivar	1.41	Hap2
Hei Jiao 1-1161	Improved cultivar	1.98	Hap2
Ji 101	Improved cultivar	1.78	Hap2
Jia Dou 36	Improved cultivar	2.09	Hap2
Jin San 14-70	Improved cultivar	1.96	Hap2
Ke 732	Improved cultivar	2.23	Hap2
L65-34	Improved cultivar	2.06	Hap2
L73-79	Improved cultivar	1.96	Hap2
LG2016	Improved cultivar	1.82	Hap2
NT 04	Improved cultivar	1.85	Hap2
Shuang 302	Improved cultivar	1.63	Hap2
Ji Yu 109	Improved cultivar	2.06	Hap2
Kariyutaka	Improved cultivar	1.96	Hap2
Nan Nong 415	Improved cultivar	2.24	Hap2
Bei Dou 40	Improved cultivar	2.36	Hap2
Fu Yu Du Lu Dou	Improved cultivar	2.47	Hap2
Ke C14-732	Improved cultivar	2.18	Hap2
Liao 08024	Improved cultivar	1.66	Hap2
Dong Nong 56	Improved cultivar	3.58	Hap3
Jiu San 14-70	Improved cultivar	4.28	Hap3
Ke Jiao 09	Improved cultivar	4.12	Hap3
L05-144	Improved cultivar	3.94	Hap3
Magnolid	Improved cultivar	4.12	Hap3
NT 12	Improved cultivar	4.08	Hap3
PI317334B	Improved cultivar	4.26	Hap3
Vinton 81	Improved cultivar	4.39	Hap3
Wu Xing Dou 2	Improved cultivar	4.22	Hap3
Wu Xing Dou 3	Improved cultivar	4.31	Hap3
Dong Nong 76	Improved cultivar	4.15	Hap4
Ke Shan 1	Improved cultivar	4.03	Hap4
Long Ken 381	Improved cultivar	3.21	Hap4
L85-144	Improved cultivar	3.66	Hap4
Ken Feng 16	Improved cultivar	3.67	Hap4
Sui Nong 43	Improved cultivar	3.96	Hap4
Da Li Huang	Landrace	4.36	Hap1
Hei Qi	Landrace	4.74	Hap1
Man Cang Jin	Landrace	4.51	Hap1
Mo Shi 1	Landrace	4.39	Hap1
q15	Landrace	4.34	Hap1
Shen Nen	Landrace	4.65	Hap1
Si Li Huang	Landrace	5.08	Hap1
T219H	Landrace	5.17	Hap1
Yang Huang Du	Landrace	2.56	Hap2
1303	Landrace	2.14	Hap2
1367	Landrace	2.45	Hap2
H914 WJH	Landrace	1.82	Hap2
Tie Jia Zi (I)	Landrace	2.23	Hap2
Gong Ye 03-557	Landrace	2.61	Hap2
Gong Ye 03-5570	Landrace	2.69	Hap2
Gong Ye 04L-141	Landrace	2.98	Hap2
Hei Tie Jia	Landrace	1.68	Hap2
Hu Lin Lao Tai Tai Tiao	Landrace	1.56	Hap2
Hua Dian Zi Hua Shao Tiao Dou	Landrace	1.68	Hap2
Hua Nan Xiao Huang Jin	Landrace	1.7	Hap2
Hua Nan Yi Wo Feng	Landrace	2.06	Hap2
Huan Hua Si Li Huang	Landrace	2.21	Hap2
Man Jin Cang	Landrace	2.42	Hap2
Mo Shi 9	Landrace	2.34	Hap2
Nattosan	Landrace	1.88	Hap2
Pan Shi Dou	Landrace	1.65	Hap2
Qian Guo Zi Hua Lan Qi	Landrace	1.41	Hap2
Qing An Hei Dou	Landrace	1.48	Hap2
Qing An Xiao Huang Jin	Landrace	2.06	Hap2
Qing Da Dou	Landrace	1.96	Hap2
Qing Gang Si Li Ding	Landrace	2.2	Hap2
Shu Lan Man Cang He	Landrace	1.51	Hap2
Shuang Liao Cha Dou	Landrace	1.68	Hap2
Shuang Se Dou	Landrace	2	Hap2
Shuang Yang Zao Huang Dou	Landrace	2.2	Hap2
SS202	Landrace	2.36	Hap2
Sun Hao Da Bai Shou Mei	Landrace	2.46	Hap2
Tai Lai Si Li Huang	Landrace	2.23	Hap2
Tian E Dan	Landrace	1.98	Hap2
Tie Jia Si Li Huang	Landrace	1.68	Hap2
Tie Jia Zi (II)	Landrace	1.77	Hap2
Tong Hua Ping Di Huang	Landrace	1.86	Hap2
Wang Qing Ba RenGou	Landrace	2.1	Hap2
Wang Qing Ji Guan	Landrace	2.09	Hap2
Wu Chang Dou	Landrace	1.96	Hap2
Xiao Bai Dou	Landrace	1.98	Hap2
Xiao Bai Qi	Landrace	2	Hap2
Xiao Huang Dou	Landrace	1.69	Hap2
Ya Po Che	Landrace	2.18	Hap2
Yong Feng Dou	Landrace	2.2	Hap2
Yong Ji Zao Dou	Landrace	2.31	Hap2
You Hu Dou	Landrace	2.13	Hap2
Yu Shu Chang Cha Dou	Landrace	2	Hap2
Zao Dou	Landrace	2.45	Hap2
Zhang Bao Da Dou	Landrace	2.36	Hap2
Zhang De Heng Da Dou	Landrace	2.1	Hap2
Zhao Yuan Zi Hua Cuo Zi	Landrace	2.65	Hap2
Zhao Zhou Xiao Li Huang	Landrace	2.34	Hap2
777	Landrace	4.18	Hap3
Huai De Bai Hua Da Li	Landrace	4.08	Hap3
Tie Jia Qing	Landrace	4.03	Hap3
Wo Dou	Landrace	4.16	Hap3
Yuan Bao Jin	Landrace	4.23	Hap3
J-LG2016-1	Landrace	3.65	Hap4
Mao Yan Dou	Landrace	3.36	Hap4
N010	Landrace	3.78	Hap4
Nong An Jiang Se Dou	Landrace	3.96	Hap4
PSB576	Landrace	3.56	Hap4
Qing Pi	Landrace	4.02	Hap4
Suo Yi Ling	Landrace	3.66	Hap4
Zi Hua Cuo Zi	Landrace	3.74	Hap4
ZYD0694	wild (G. soja)	1.68	Hap2
ZYD6798	wild (G. soja)	1.98	Hap2
ZYD00006	wild (G. soja)	1.62	Hap2
ZYD0088	wild (G. soja)	1.66	Hap2
ZYD0097	wild (G. soja)	1.58	Hap2
ZYD0118	wild (G. soja)	1.41	Hap2
ZYD0170	wild (G. soja)	1.16	Hap2
ZYD0371	wild (G. soja)	1.52	Hap2
ZYD0386	wild (G. soja)	1.9	Hap2
ZYD6832	wild (G. soja)	1.62	Hap2
