# Supplementary material for: QTL Mapping and Data Mining to Identify Genes Associated with Soybean Epicotyl Length Using Cultivated Soybean and Wild Soybean
Source: Int J Mol Sci. 2024 Mar 14;25(6):3296. doi: 10.3390/ijms25063296 (PMC10970105; doi:10.3390/ijms25063296)
Supplement: Supplementary file 1 [file ijms-25-03296-s001.zip › Table S7.xlsx]

## Sheet: Sheet1
Table S7. Promoter element analysis of the Superior haplotype
No.	Hap1	Hap2
1	ABRE	ABRE
2	ABRE3a	ABRE3a
3	ABRE4	ABRE4
4	ACE	ACE
5	ARE	ARE
6	AT~TATA-box	AT~TATA-box
7	Box 4	Box 4
8	CAAT-box	CAAT-box
9	CAT-box	CAT-box
10	CCAAT-box	CCAAT-box
11	CGTCA-motif	CGTCA-motif
12	ERE	ERE
13	F-box	F-box
14	G-Box	G-Box
15	G-box	G-box
16	GC-motif	GC-motif
17	GT1-motif	GT1-motif
18	L-box
19	MYB	MYB
20	MYB recognition site	MYB recognition site
21	MYB-like sequence	MYB-like sequence
22	MYC	MYC
23	Myb	Myb
24	Myb-binding site	Myb-binding site
25	O2-site	O2-site
26	STRE	STRE
27	-	TATA
28	TATA-box	TATA-box
29	TATC-box	-
30	TC-rich repeats	TC-rich repeats
31	TCA	TCA
32	TCA-element	TCA-element
33	TCCC-motif	TCCC-motif
34	TCT-motif	TCT-motif
35	TGA-element	TGA-element
36	TGACG-motif	TGACG-motif
37	Unnamed__1	Unnamed__1
38	Unnamed__4	Unnamed__4
39	WRE3	WRE3
40	as-1	as-1
41	chs-CMA1a	chs-CMA1a
42	dOCT	dOCT
