# Supplementary material for: QTL Mapping and Data Mining to Identify Genes Associated with Soybean Epicotyl Length Using Cultivated Soybean and Wild Soybean
Source: Int J Mol Sci. 2024 Mar 14;25(6):3296. doi: 10.3390/ijms25063296 (PMC10970105; doi:10.3390/ijms25063296)
Supplement: Supplementary file 1 [file ijms-25-03296-s001.zip › Table S8.xlsx]

## Sheet: hundred-seed weight
hundred-seed weight of CSSLs
Name	2021	2022
CSSL-R1	17.3559	17.9194
CSSL-R2	15.8847	17.7398
CSSL-R3	18.1143	17.5386
CSSL-R4	17.8876	16.408
CSSL-R5	24.34	17.5396
CSSL-R6	17.2897	16.858
CSSL-R7	7.63103	7.77317
CSSL-R8	19.0335	17.4185
CSSL-R9	7.72745	7.15587
CSSL-R10	15.2967	14.6995
CSSL-R11	17.2087	157.216
CSSL-R12	10.4122	9.17319
CSSL-R13	16.912	17.5392
CSSL-R14	21.5673	18.2618
CSSL-R15	17.4297	19.2407
CSSL-R16	20.1191	20.4779
CSSL-R17	17.6622	18.1064
CSSL-R18	16.3	15.7458
CSSL-R19	17.5828	17.4044
CSSL-R20	16.0047	17.4167
CSSL-R21	22.5492	20.1625
CSSL-R22	17.4967	17.616
CSSL-R23	17.8157	18.6206
CSSL-R24	16.201	16.8789
CSSL-R25	16.2407	16.5657
CSSL-R26	17.14	17.4167
CSSL-R27	16.5967	16.152
CSSL-R28	17.1867	17.3388
CSSL-R29	17.81	16.62
CSSL-R30	16.8932	16.6152
CSSL-R31	14.8568	15.6153
CSSL-R32	16.3833	16.3271
CSSL-R33	13.17	10.1584
CSSL-R34	13.352	13.9516
CSSL-R35	16.22	16.1761
CSSL-R36	16.6467	16.7292
CSSL-R37	10.3833	9.79367
CSSL-R38	16.337	17.7675
CSSL-R39	8.02637	8.56829
CSSL-R40	16.929	17.2471
CSSL-R41	13.0444	14.2636
CSSL-R42	13.5519	12.8344
CSSL-R43	14.0341	13.7437
CSSL-R44	13.0069	12.435
CSSL-R45	16.7555	16.8528
CSSL-R46	16.3844	16.5871
CSSL-R47	17.8899	16.3558
CSSL-R48	16.0518	17.0321
CSSL-R49	16.8405	15.5735
CSSL-R50	15.9096	16.9768
CSSL-R51	17.6131	17.8735
CSSL-R52	14.8382	15.05
CSSL-R53	21.5996	22.6083
CSSL-R54	9.56857	10.2955
CSSL-R55	17.9687	18.024
CSSL-R56	18.9255	17.8887
CSSL-R57	17.5033	17.319
CSSL-R58	15.2885	14.9133
CSSL-R59	16.53	17.6706
CSSL-R60	17.9467	17.7871
CSSL-R61	16.7175	17.505
CSSL-R62	17.37	17.1459
CSSL-R63	12.265	11.6136
CSSL-R64	16.1513	15.7234
CSSL-R65	16.6385	16.9433
CSSL-R66	18.7322	17.528
CSSL-R67	17.43	16.3952
CSSL-R68	16.7411	16.9615
CSSL-R69	17.5456	16.3259
CSSL-R70	16.5605	15.3637
CSSL-R71	17.1455	18.8838
CSSL-R72	15.6432	14.9723
CSSL-R73	16.63	16.8305
CSSL-R74	20.3896	21.3446
CSSL-R75	7.98333	8.54978
CSSL-R76	16.8	15.799
CSSL-R77	17.9811	18.032
CSSL-R78	17.4801	16.4487
CSSL-R79	17.5287	17.0862
CSSL-R80	15.4633	14.9078
CSSL-R81	17.1668	18.0549
CSSL-R82	17.1	17.6976
CSSL-R83	19.5467	18.0414
CSSL-R84	20.1633	23.4654
CSSL-R85	16.9035	17.6239
CSSL-R86	23.9503	24.1208
CSSL-R87	21.9452	22.0313
CSSL-R88	15.246	14.5252
CSSL-R89	17.3328	17.5793
CSSL-R90	22.1793	21.781
CSSL-R91	7.93099	8.82142
CSSL-R92	16.9148	17.738
CSSL-R93	15.9724	16.4031
CSSL-R94	17.3867	17.1681
CSSL-R95	17.2707	16.6367
CSSL-R96	17.221	16.3456
CSSL-R97	16.168	15.5709
CSSL-R98	17.6192	17.5625
CSSL-R99	21.4333	20.1191
CSSL-R100	16.6535	17.5141
CSSL-R101	14.97	15.1887
CSSL-R102	14.3133	14.1166
CSSL-R103	13.1448	11.0885
CSSL-R104	16.3653	17.2281
CSSL-R105	15.7748	15.8959
CSSL-R106	14.3	14.3076
CSSL-R107	14.5725	12.88
CSSL-R108	7.37512	8.99215
CSSL-R109	25.2584	25.3026
CSSL-R110	20.8222	18.313
CSSL-R111	22.7933	18.5398
CSSL-R112	12.5054	10.7343
CSSL-R113	13.5009	13.5622
CSSL-R114	13.0493	12.6648
CSSL-R115	17.2261	16.782
CSSL-R116	9.41333	8.08305
CSSL-R117	21.5341	23.6383
CSSL-R118	13.2367	12.4435
CSSL-R119	17.037	17.8268
CSSL-R120	18.5235	17.6991
CSSL-R121	17.0131	17.5421
CSSL-R122	9.575	9.59407
CSSL-R123	18.13	19.4212
CSSL-R124	20.56	22.7589
CSSL-R125	16.865	17.15
CSSL-R126	16.7033	16.9966
CSSL-R127	12.8	13.4324
CSSL-R128	17.174	17.6206
CSSL-R129	22.3	21.29
CSSL-R130	8.41502	8.83921
CSSL-R131	21.8436	22.3954
CSSL-R132	20.1744	21.3254
CSSL-R133	21.6133	19.8028
CSSL-R134	16.7967	15.505
CSSL-R135	16.8307	15.9237
CSSL-R136	16.795	16.0135
CSSL-R137	16.8041	15.9422
CSSL-R138	22.74	21.432
CSSL-R139	22.9933	21.3224
CSSL-R140	16.2131	16.8789
CSSL-R141	25.66	26.2336
CSSL-R142	17.2567	17.6588
CSSL-R143	17.545	16.8722
CSSL-R144	18.4215	22.7345
CSSL-R145	19.8431	20.1087
CSSL-R146	19.0559	21.7058
CSSL-R147	17.5622	16.9795
CSSL-R148	19.181	17.8113
CSSL-R149	17.0654	17.1707
CSSL-R150	17.1268	16.946
CSSL-R151	18.209	19.223
CSSL-R152	19.5031	18.4703
CSSL-R153	7.55148	6.10585
CSSL-R154	17.8249	17.8576
CSSL-R155	19.97	20.8867
CSSL-R156	23.3093	24.2014
CSSL-R157	18.99	19.1141
CSSL-R158	18.5373	18.9749
CSSL-R159	16.52	17.796
CSSL-R160	16.5478	16.8174
CSSL-R161	16.7567	16.6695
CSSL-R162	19.417	21.3968
CSSL-R163	16.7691	17.5156
CSSL-R164	15.6896	14.6345
CSSL-R165	16.34	15.3827
CSSL-R166	16.3593	15.8557
CSSL-R167	14.9119	13.9052
CSSL-R168	17.53	17.721
CSSL-R169	15.9323	16.8354
CSSL-R170	17.7691	17.6851
CSSL-R171	18.1274	17.4887
CSSL-R172	14.755	14.3769
CSSL-R173	17.345	17.5792
CSSL-R174	17.0565	16.6596
CSSL-R175	16.5733	16.14
CSSL-R176	21.8032	20.0953
CSSL-R177	16.7284	17.0422
CSSL-R178	17.13	17.45
CSSL-R179	17.17	17.7921
CSSL-R180	20.9663	18.9322
CSSL-R181	18.6176	17.7732
CSSL-R182	17.4789	18.0387
CSSL-R183	17.8109	17.3116
CSSL-R184	18.605	18.1118
CSSL-R185	10.7931	9.61038
CSSL-R186	16.5265	17.5448
CSSL-R187	17.8721	17.5187
CSSL-R188	18.51	17.7099
CSSL-R189	17.8727	17.6186
CSSL-R190	20.7211	19.895
CSSL-R191	18.6247	17.2934
CSSL-R192	16.155	16.6688
CSSL-R193	27.89	26.9344
CSSL-R194	16.5214	16.4749
CSSL-R195	16.8681	16.7147
CSSL-R196	18.4343	17.6436
CSSL-R197	19.608	19.9086
CSSL-R198	13.3236	10.5729
CSSL-R199	20.7581	20.8835
CSSL-R200	20.2633	21.9267
CSSL-R201	17.73	18.4633
CSSL-R202	2.96667	2.98167
CSSL-R203	17.1667	17.0947
CSSL-R204	16.9574	16.8795
CSSL-R205	13.9625	12.2403
CSSL-R206	12.1861	11.7533
CSSL-R207	10.5507	11.1837

## Sheet: plant height
plant height of CSSLs (cm)
Name	2021	2022
CSSL-R1	72.6667	79
CSSL-R2	75.5	75
CSSL-R3	77.6667	77.8
CSSL-R4	66.3333	68.6
CSSL-R5	109.333	132
CSSL-R6	74.3333	79.2
CSSL-R7	79	82.8
CSSL-R8	96.3333	96.8
CSSL-R9	90.2	104.8
CSSL-R10	82.6667	100
CSSL-R11	64.6667	89.6667
CSSL-R12	65	83.4
CSSL-R13	84.3333	96.5
CSSL-R14	93.5	82.1932
CSSL-R15	83	98.5
CSSL-R16	68.5	91.3333
CSSL-R17	82.3333	114
CSSL-R18	85	98.75
CSSL-R19	100.6	120.667
CSSL-R20	101.5	97
CSSL-R21	117	155
CSSL-R22	94.6667	117.6
CSSL-R23	80	106.4
CSSL-R24	83.75	99
CSSL-R25	94	100.667
CSSL-R26	114.667	130
CSSL-R27	93.3333	107.5
CSSL-R28	86	88.25
CSSL-R29	60.3333	70.1729
CSSL-R30	64.6667	84
CSSL-R31	85.3333	94.6667
CSSL-R32	53.3333	85
CSSL-R33	72.6667	92.6
CSSL-R34	60	95.5
CSSL-R35	43	103
CSSL-R36	89.3333	110
CSSL-R37	74.6667	94.6
CSSL-R38	74.6667	96.5
CSSL-R39	56.3333	93
CSSL-R40	64	101
CSSL-R41	75.5	98
CSSL-R42	80	97.8
CSSL-R43	83.3333	100
CSSL-R44	78	114.8
CSSL-R45	78.6667	107.2
CSSL-R46	87.6667	112
CSSL-R47	92.6667	109
CSSL-R48	96.6667	117.4
CSSL-R49	83.3333	108.2
CSSL-R50	59.6667	80.6
CSSL-R51	75.6667	96.6667
CSSL-R52	106.667	121.25
CSSL-R53	85.6667	119.4
CSSL-R54	82.6667	116.4
CSSL-R55	89.3333	92.1952
CSSL-R56	95.5	103.8
CSSL-R57	67	98
CSSL-R58	61	79.2
CSSL-R59	55.3333	82.6
CSSL-R60	69	88.4
CSSL-R61	78.6667	91.8
CSSL-R62	72	96.5
CSSL-R63	61	106.5
CSSL-R64	100.333	130.5
CSSL-R65	86.6667	119.6
CSSL-R66	107	113.4
CSSL-R67	91.3333	108.2
CSSL-R68	84.6667	102.8
CSSL-R69	90.6667	110.4
CSSL-R70	72	122
CSSL-R71	75.5	105.2
CSSL-R72	66.9328	62.1944
CSSL-R73	71.6667	102.2
CSSL-R74	80	106.2
CSSL-R75	88	93.5
CSSL-R76	75.6667	103.6
CSSL-R77	88.5	125.6
CSSL-R78	103	99
CSSL-R79	83.14	91.3281
CSSL-R80	71.6667	123
CSSL-R81	76.5	88.2
CSSL-R82	67.6667	98.2
CSSL-R83	65	106.4
CSSL-R84	76.6667	115.8
CSSL-R85	91	120.4
CSSL-R86	79	134.5
CSSL-R87	101	123.2
CSSL-R88	114	86.8
CSSL-R89	57.3333	90.8
CSSL-R90	117.432	111.194
CSSL-R91	87.3333	106.75
CSSL-R92	51.3333	88.6
CSSL-R93	63.7283	71.4
CSSL-R94	46.6667	69.8
CSSL-R95	62	78.4
CSSL-R96	47.6667	90.8
CSSL-R97	53.6667	84.2
CSSL-R98	56.3333	85.8
CSSL-R99	63.3333	135.8
CSSL-R100	61.5	93.8
CSSL-R101	59.6667	100.25
CSSL-R102	78.5	82
CSSL-R103	54.3333	87.2
CSSL-R104	70.5	84.4
CSSL-R105	62.6667	93.4
CSSL-R106	107.75	119.6
CSSL-R107	71.72	80.2188
CSSL-R108	55.5	89.6667
CSSL-R109	124	99.8
CSSL-R110	75.6667	97.8
CSSL-R111	81	145.4
CSSL-R112	81	128.4
CSSL-R113	80	111.25
CSSL-R114	112	113.6
CSSL-R115	80	111.4
CSSL-R116	79	121.5
CSSL-R117	62.3333	97.8
CSSL-R118	50.6667	89
CSSL-R119	76.6667	105.6
CSSL-R120	75.6667	99.75
CSSL-R121	73.6667	116
CSSL-R122	75	108.4
CSSL-R123	57	90.4
CSSL-R124	88	97.8
CSSL-R125	63.5	106.25
CSSL-R126	94.6667	113.5
CSSL-R127	51	118.6
CSSL-R128	83.2422	136.75
CSSL-R129	93.1873	121.4
CSSL-R130	66.19	112.4
CSSL-R131	72.6667	87.2
CSSL-R132	81.2	96.75
CSSL-R133	79.2	86.4
CSSL-R134	72.3333	91
CSSL-R135	62	83.2
CSSL-R136	80	92.8
CSSL-R137	63.6667	81.6
CSSL-R138	100.33	108.832
CSSL-R139	85.6667	88.75
CSSL-R140	71	95.8
CSSL-R141	68.6667	83.8
CSSL-R142	97.6667	92.75
CSSL-R143	100	90.375
CSSL-R144	73.3333	99.2
CSSL-R145	94.3333	98
CSSL-R146	70	113.8
CSSL-R147	97	113.2
CSSL-R148	93.251	87.2
CSSL-R149	70	92
CSSL-R150	80	108.25
CSSL-R151	82	105.75
CSSL-R152	53	96
CSSL-R153	69.3333	121
CSSL-R154	91	128.2
CSSL-R155	93.9436	96.25
CSSL-R156	66	145.75
CSSL-R157	110	97.2
CSSL-R158	110.5	116
CSSL-R159	66	95
CSSL-R160	79	101.5
CSSL-R161	83.3333	106.4
CSSL-R162	77	116.6
CSSL-R163	87.6667	104.6
CSSL-R164	102.667	117.4
CSSL-R165	108.667	110
CSSL-R166	113.75	130.6
CSSL-R167	76.6667	87.25
CSSL-R168	83.3333	95.4
CSSL-R169	113.5	125.4
CSSL-R170	67.2	92
CSSL-R171	83	104.2
CSSL-R172	96.275	126.75
CSSL-R173	85.3333	109.8
CSSL-R174	90.6667	96.8
CSSL-R175	80.3333	77.9322
CSSL-R176	97.5	110
CSSL-R177	71.612	83.9211
CSSL-R178	84	96.9232
CSSL-R179	95	89.1422
CSSL-R180	88.3333	100.928
CSSL-R181	95	88.6211
CSSL-R182	81.6667	106.25
CSSL-R183	91.6667	101.4
CSSL-R184	126.5	141.6
CSSL-R185	81.3333	102.8
CSSL-R186	93.3333	115.6
CSSL-R187	101	111.2
CSSL-R188	92	124.8
CSSL-R189	80.6667	107.5
CSSL-R190	78	109.6
CSSL-R191	87.3333	87.4
CSSL-R192	71.5	72.4
CSSL-R193	70.3333	93.2
CSSL-R194	70.5	81.8
CSSL-R195	85.6667	87.2
CSSL-R196	89.75	93.8
CSSL-R197	113	97.4
CSSL-R198	86	78.8
CSSL-R199	69.5	103.6
CSSL-R200	115.333	93
CSSL-R201	101.667	97.6667
CSSL-R202	120.06	116.843
CSSL-R203	92	99.4
CSSL-R204	75	84.6
CSSL-R205	76.6667	79
CSSL-R206	101.333	104
CSSL-R207	97	121.8

## Sheet: protein
protein of CSSLs (%)
Name	2021	2022
CSSL-R1	39.8206	40.2137
CSSL-R2	40.9303	41.1787
CSSL-R3	40.4614	40.3336
CSSL-R4	40.9929	39.0899
CSSL-R5	42.3144	40.9758
CSSL-R6	41.2275	41.2444
CSSL-R7	39.4845	40.2739
CSSL-R8	42.5031	42.7222
CSSL-R9	40.9563	39.757
CSSL-R10	40.2868	40.2305
CSSL-R11	40.0889	40.5024
CSSL-R12	41.1897	42.5489
CSSL-R13	39.2282	40.9553
CSSL-R14	40.7229	39.5692
CSSL-R15	39.8193	39.8352
CSSL-R16	39.8412	40.4957
CSSL-R17	41.583	40.6808
CSSL-R18	41.2608	40.9189
CSSL-R19	40.1872	41.0273
CSSL-R20	40.7738	41.6492
CSSL-R21	41.0986	39.4805
CSSL-R22	42.7898	43.2863
CSSL-R23	38.6361	40.8589
CSSL-R24	41.8166	43.4757
CSSL-R25	38.4685	40.7546
CSSL-R26	41.3573	41.2087
CSSL-R27	40.3708	40.5328
CSSL-R28	40.4398	40.3615
CSSL-R29	41.0979	40.7822
CSSL-R30	40.8278	40.7791
CSSL-R31	39.3264	39.4452
CSSL-R32	39.1156	42.1348
CSSL-R33	40.0171	41.5986
CSSL-R34	42.5537	43.8098
CSSL-R35	39.781	39.7094
CSSL-R36	40.0204	40.4645
CSSL-R37	40.9738	39.7268
CSSL-R38	42.7766	40.5365
CSSL-R39	42.6521	46.0216
CSSL-R40	42.6071	42.6762
CSSL-R41	41.4927	42.5679
CSSL-R42	40.8106	39.5617
CSSL-R43	40.3292	39.8848
CSSL-R44	40.7837	41.7975
CSSL-R45	39.5225	40.4676
CSSL-R46	41.4006	42.4083
CSSL-R47	40.6989	42.1582
CSSL-R48	39.6607	39.57
CSSL-R49	40.6908	43.8741
CSSL-R50	41.3383	42.5778
CSSL-R51	39.8006	41.1091
CSSL-R52	40.8991	41.1196
CSSL-R53	41.6978	39.2713
CSSL-R54	42.893	43.6389
CSSL-R55	42.4821	42.3391
CSSL-R56	40.7004	40.2038
CSSL-R57	40.8451	43.3678
CSSL-R58	41.7032	42.1558
CSSL-R59	40.7033	41.3771
CSSL-R60	40.501	39.907
CSSL-R61	40.6688	42.998
CSSL-R62	40.6118	41.1227
CSSL-R63	40.6879	42.1237
CSSL-R64	41.7036	40.8144
CSSL-R65	40.7253	40.5052
CSSL-R66	40.7037	41.0171
CSSL-R67	40.3611	40.3887
CSSL-R68	39.7509	40.3639
CSSL-R69	38.8586	37.2244
CSSL-R70	41.1421	39.6663
CSSL-R71	39.7671	39.8528
CSSL-R72	40.1842	40.8735
CSSL-R73	41.6341	41.0512
CSSL-R74	41.3124	40.9846
CSSL-R75	40.6552	41.7311
CSSL-R76	41.9996	42.9434
CSSL-R77	39.8893	39.0106
CSSL-R78	41.901	41.3446
CSSL-R79	41.7731	40.9377
CSSL-R80	40.2675	39.424
CSSL-R81	40.7827	40.9198
CSSL-R82	42.0791	41.9873
CSSL-R83	38.4543	43.1285
CSSL-R84	42.6126	42.6261
CSSL-R85	42.1007	38.8448
CSSL-R86	38.523	37.9286
CSSL-R87	40.2301	44.4378
CSSL-R88	40.5897	40.9176
CSSL-R89	40.3709	40.3325
CSSL-R90	39.7361	40.1154
CSSL-R91	41.8095	40.8867
CSSL-R92	44.0933	41.7837
CSSL-R93	39.9648	47.0499
CSSL-R94	39.3616	41.5004
CSSL-R95	41.0436	40.3334
CSSL-R96	40.7974	39.8628
CSSL-R97	45.3315	46.7667
CSSL-R98	41.306	40.1787
CSSL-R99	41.771	42.4538
CSSL-R100	38.2446	37.7732
CSSL-R101	39.3045	39.0125
CSSL-R102	39.4384	37.2851
CSSL-R103	37.8493	38.6876
CSSL-R104	40.1275	38.6562
CSSL-R105	38.8544	38.2125
CSSL-R106	40.8733	39.25
CSSL-R107	43.0267	42.7767
CSSL-R108	40.3708	42.8431
CSSL-R109	41.6287	42.8402
CSSL-R110	41.2731	41.674
CSSL-R111	40.3265	40.4221
CSSL-R112	40.982	39.8519
CSSL-R113	41.583	40.2418
CSSL-R114	41.3053	40.1173
CSSL-R115	43.2016	43.6189
CSSL-R116	42.2066	42.0944
CSSL-R117	42.3692	41.0828
CSSL-R118	39.6365	40.3949
CSSL-R119	41.4982	41.7633
CSSL-R120	40.7126	41.2631
CSSL-R121	39.7168	39.9597
CSSL-R122	40.4702	40.4181
CSSL-R123	40.3398	40.1563
CSSL-R124	40.3732	42.0655
CSSL-R125	43.68	44.1695
CSSL-R126	42.4338	41.5759
CSSL-R127	42.281	43.77
CSSL-R128	41.4927	39.9622
CSSL-R129	41.2192	41.4903
CSSL-R130	39.9977	41.1606
CSSL-R131	42.8684	43.9734
CSSL-R132	40.3946	40.1492
CSSL-R133	40.6408	41.1939
CSSL-R134	40.3615	40.1963
CSSL-R135	43.412	43.6558
CSSL-R136	40.407	41.4988
CSSL-R137	39.4244	42.05
CSSL-R138	40.2731	40.0382
CSSL-R139	41.7372	40.0481
CSSL-R140	42.0428	41.1917
CSSL-R141	41.4425	43.4282
CSSL-R142	41.9978	41.4121
CSSL-R143	40.5518	39.9957
CSSL-R144	42.6754	42.46
CSSL-R145	40.2087	40.3999
CSSL-R146	40.1274	41.7183
CSSL-R147	46.044	45.6762
CSSL-R148	40.0797	42.8971
CSSL-R149	38.8322	41.1654
CSSL-R150	40.3731	40.6183
CSSL-R151	42.3481	44.2245
CSSL-R152	39.7953	39.409
CSSL-R153	40.457	39.5179
CSSL-R154	37.3906	39.0162
CSSL-R155	38.9807	40.5332
CSSL-R156	41.3541	42.894
CSSL-R157	39.7357	40.9233
CSSL-R158	39.4896	39.7301
CSSL-R159	40.3214	39.2933
CSSL-R160	39.0488	39.8054
CSSL-R161	39.6271	41.3409
CSSL-R162	41.8786	41.4945
CSSL-R163	40.5907	42.4585
CSSL-R164	40.3349	39.6363
CSSL-R165	41.4723	40.2823
CSSL-R166	39.9376	40.0846
CSSL-R167	42.5006	42.8323
CSSL-R168	41.4691	41.6116
CSSL-R169	41.2224	39.8598
CSSL-R170	40.2287	40.9077
CSSL-R171	41.689	41.2213
CSSL-R172	40.6083	43.4456
CSSL-R173	41.0108	42.4281
CSSL-R174	39.6743	39.2759
CSSL-R175	41.1082	43.5418
CSSL-R176	42.8063	41.4333
CSSL-R177	41.3714	40.7712
CSSL-R178	39.3436	40.1224
CSSL-R179	39.629	40.3388
CSSL-R180	38.8619	40.1652
CSSL-R181	37.9868	41.0166
CSSL-R182	37.5197	39.1245
CSSL-R183	39.4976	38.4041
CSSL-R184	39.2742	38.7715
CSSL-R185	40.9801	41.2548
CSSL-R186	39.3943	40.669
CSSL-R187	39.9404	40.3478
CSSL-R188	40.5562	41.1916
CSSL-R189	39.9148	41.2498
CSSL-R190	43.7113	39.3707
CSSL-R191	41.6399	43.2691
CSSL-R192	42.7026	38.9072
CSSL-R193	42.0069	41.7954
CSSL-R194	38.9337	42.3501
CSSL-R195	40.6815	39.0317
CSSL-R196	43.603	40.1039
CSSL-R197	41.0988	44.3325
CSSL-R198	42.9923	40.6943
CSSL-R199	40.311	38.833
CSSL-R200	40.7044	39.0791
CSSL-R201	41.94	41.62
CSSL-R202	40.5251	40.472
CSSL-R203	39.5147	40.4977
CSSL-R204	40.6409	39.6226
CSSL-R205	41.0137	39.22
CSSL-R206	40.7023	39.3428
CSSL-R207	42.2159	39.9846

## Sheet: oil
oil of CSSLs (%)
Name	2021	2022
CSSL-R1	21.5685	21.0402
CSSL-R2	21.8621	21.2073
CSSL-R3	21.1835	21.0576
CSSL-R4	20.8366	20.9876
CSSL-R5	21.632	18.9891
CSSL-R6	21.3369	20.3273
CSSL-R7	21.1991	20.2895
CSSL-R8	20.1017	19.4952
CSSL-R9	21.3521	20.3205
CSSL-R10	21.6375	20.0109
CSSL-R11	21.4548	21.4941
CSSL-R12	21.0856	20.2985
CSSL-R13	21.5746	20.9813
CSSL-R14	21.1293	20.1221
CSSL-R15	21.9194	21.4753
CSSL-R16	21.7794	20.7872
CSSL-R17	21.2422	20.3822
CSSL-R18	21.4753	20.4634
CSSL-R19	21.1374	20.9798
CSSL-R20	21.1537	20.7298
CSSL-R21	21.3109	20.9734
CSSL-R22	20.0891	20.2378
CSSL-R23	21.7197	21.4562
CSSL-R24	20.4235	19.513
CSSL-R25	21.6051	20.8989
CSSL-R26	21.1543	20.9166
CSSL-R27	21.4437	21.077
CSSL-R28	21.4041	21.2427
CSSL-R29	21.6416	21.2767
CSSL-R30	21.7914	21.1174
CSSL-R31	21.9341	20.8873
CSSL-R32	21.3731	20.4212
CSSL-R33	21.7612	20.611
CSSL-R34	20.8919	20.233
CSSL-R35	21.2206	21.246
CSSL-R36	21.0103	20.5098
CSSL-R37	21.1241	20.8344
CSSL-R38	21.2031	20.8634
CSSL-R39	20.7358	21.0024
CSSL-R40	21.08	19.8113
CSSL-R41	21.167	19.7205
CSSL-R42	21.5692	20.649
CSSL-R43	21.7663	20.6639
CSSL-R44	21.7628	20.5794
CSSL-R45	21.4464	20.9771
CSSL-R46	21.6219	20.1399
CSSL-R47	21.0318	20.568
CSSL-R48	21.167	21.0924
CSSL-R49	21.5164	20.3869
CSSL-R50	21.467	19.901
CSSL-R51	21.455	20.5807
CSSL-R52	20.8401	20.8402
CSSL-R53	21.514	21.3884
CSSL-R54	20.9952	20.4848
CSSL-R55	20.7753	20.1563
CSSL-R56	21.4819	20.9914
CSSL-R57	21.5288	20.6528
CSSL-R58	21.2997	20.7624
CSSL-R59	21.4408	21.3936
CSSL-R60	21.682	20.8084
CSSL-R61	21.8739	21.2084
CSSL-R62	21.7262	20.9089
CSSL-R63	21.1207	19.8768
CSSL-R64	21.4535	20.621
CSSL-R65	21.9982	20.2578
CSSL-R66	21.3859	20.749
CSSL-R67	21.5834	20.6112
CSSL-R68	22.1157	21.0193
CSSL-R69	21.8276	21.0271
CSSL-R70	21.4036	20.9714
CSSL-R71	21.3461	21.1987
CSSL-R72	21.2744	22.0316
CSSL-R73	21.3377	21.0605
CSSL-R74	21.5434	20.9942
CSSL-R75	19.5909	19.3748
CSSL-R76	20.6215	19.5275
CSSL-R77	21.1713	20.482
CSSL-R78	21.4626	19.5514
CSSL-R79	20.1742	20.2622
CSSL-R80	21.0658	20.5198
CSSL-R81	21.5441	21.2704
CSSL-R82	21.288	21.1648
CSSL-R83	21.9788	20.3583
CSSL-R84	21.209	20.7364
CSSL-R85	21.1662	20.6392
CSSL-R86	21.2624	19.8388
CSSL-R87	18.8843	20.6997
CSSL-R88	21.6004	20.6001
CSSL-R89	21.3967	21.0044
CSSL-R90	21.2281	20.8731
CSSL-R91	21.4035	21.3038
CSSL-R92	20.9417	20.7898
CSSL-R93	18.8039	18.012
CSSL-R94	18.1823	20.6934
CSSL-R95	21.4129	20.8704
CSSL-R96	21.3864	21.3053
CSSL-R97	20.0127	18.4549
CSSL-R98	21.8654	21.1853
CSSL-R99	19.6595	19.9349
CSSL-R100	22.4024	22.1775
CSSL-R101	21.9081	21.2865
CSSL-R102	21.9032	22.1118
CSSL-R103	22.2452	20.944
CSSL-R104	21.6791	21.6152
CSSL-R105	21.8444	21.0239
CSSL-R106	20.9629	19.7345
CSSL-R107	20.8736	21.3321
CSSL-R108	21.0009	20.5483
CSSL-R109	20.8854	20.4247
CSSL-R110	21.2234	20.5247
CSSL-R111	21.0879	20.7046
CSSL-R112	21.4645	20.7892
CSSL-R113	21.1133	20.7167
CSSL-R114	21.0462	19.8142
CSSL-R115	20.7914	20.7764
CSSL-R116	20.1024	20.0084
CSSL-R117	21.3968	21.1167
CSSL-R118	22.0003	20.8682
CSSL-R119	21.4819	20.4336
CSSL-R120	21.0373	20.5973
CSSL-R121	21.2208	20.8632
CSSL-R122	20.6634	20.6745
CSSL-R123	21.6975	20.8547
CSSL-R124	18.2996	20.59
CSSL-R125	20.7971	18.7732
CSSL-R126	21.5107	20.7815
CSSL-R127	20.7363	19.5547
CSSL-R128	21.1003	20.7612
CSSL-R129	20.7564	19.3626
CSSL-R130	19.834	19.4971
CSSL-R131	21.0052	20.2935
CSSL-R132	21.0107	20.6012
CSSL-R133	21.1609	20.3
CSSL-R134	21.3656	21.088
CSSL-R135	20.5302	19.7577
CSSL-R136	21.5136	20.7118
CSSL-R137	21.166	19.4864
CSSL-R138	21.1183	20.5736
CSSL-R139	20.9204	20.6837
CSSL-R140	20.8335	20.4138
CSSL-R141	21.0676	20.5327
CSSL-R142	21.3915	20.3475
CSSL-R143	21.047	20.685
CSSL-R144	20.2563	20.0025
CSSL-R145	20.7721	20.9171
CSSL-R146	21.2236	19.8943
CSSL-R147	20.1805	18.9071
CSSL-R148	20.2217	20.2779
CSSL-R149	20.0077	20.7694
CSSL-R150	21.1142	20.9405
CSSL-R151	19.9561	19.4814
CSSL-R152	21.5173	20.3942
CSSL-R153	21.5777	20.9516
CSSL-R154	21.3349	20.13
CSSL-R155	21.4372	20.6487
CSSL-R156	20.1947	18.4794
CSSL-R157	20.0341	20.1958
CSSL-R158	20.4501	20.4501
CSSL-R159	21.5521	21.0662
CSSL-R160	21.5373	20.8035
CSSL-R161	21.1846	19.546
CSSL-R162	21.1069	20.4092
CSSL-R163	21.45	20.1898
CSSL-R164	20.6516	19.946
CSSL-R165	21.0294	20.4535
CSSL-R166	21.101	20.0963
CSSL-R167	21.0505	20.4782
CSSL-R168	20.8509	20.4853
CSSL-R169	21.4266	20.5403
CSSL-R170	21.5608	20.638
CSSL-R171	21.0568	20.8853
CSSL-R172	21.6094	20.3357
CSSL-R173	21.5989	20.7632
CSSL-R174	21.8148	20.7465
CSSL-R175	20.9506	19.011
CSSL-R176	21.1974	20.6563
CSSL-R177	21.1184	21.2283
CSSL-R178	20.6245	21.0662
CSSL-R179	21.5735	21.3441
CSSL-R180	21.4359	21.0866
CSSL-R181	21.9811	20.0728
CSSL-R182	21.8933	20.8609
CSSL-R183	20.8089	20.5726
CSSL-R184	20.985	20.05
CSSL-R185	21.5495	20.8569
CSSL-R186	18.9209	20.8102
CSSL-R187	21.648	21.0917
CSSL-R188	21.309	21.0768
CSSL-R189	21.5582	19.9099
CSSL-R190	21.1117	21.1993
CSSL-R191	21.2203	20.5787
CSSL-R192	20.9766	20.4558
CSSL-R193	21.0788	20.4731
CSSL-R194	21.5253	20.7883
CSSL-R195	21.3584	21.5284
CSSL-R196	20.6313	21.0727
CSSL-R197	21.6369	18.5203
CSSL-R198	21.279	21.1009
CSSL-R199	21.2703	20.2524
CSSL-R200	21.6942	20.0874
CSSL-R201	20.21	20.68
CSSL-R202	19.7423	19.9525
CSSL-R203	20.8958	20.7351
CSSL-R204	21.0549	21.1184
CSSL-R205	21.0115	21.181
CSSL-R206	21.4215	20.8846
CSSL-R207	21.4059	20.8895
